# Supplementary material
Source: PubMed Central journal article supplement (PMC3517248)
Supplement: supp_tpc.112.105031_tpc105031Supplemental.pdf [file supp_tpc.112.105031_tpc105031Supplemental.pdf]

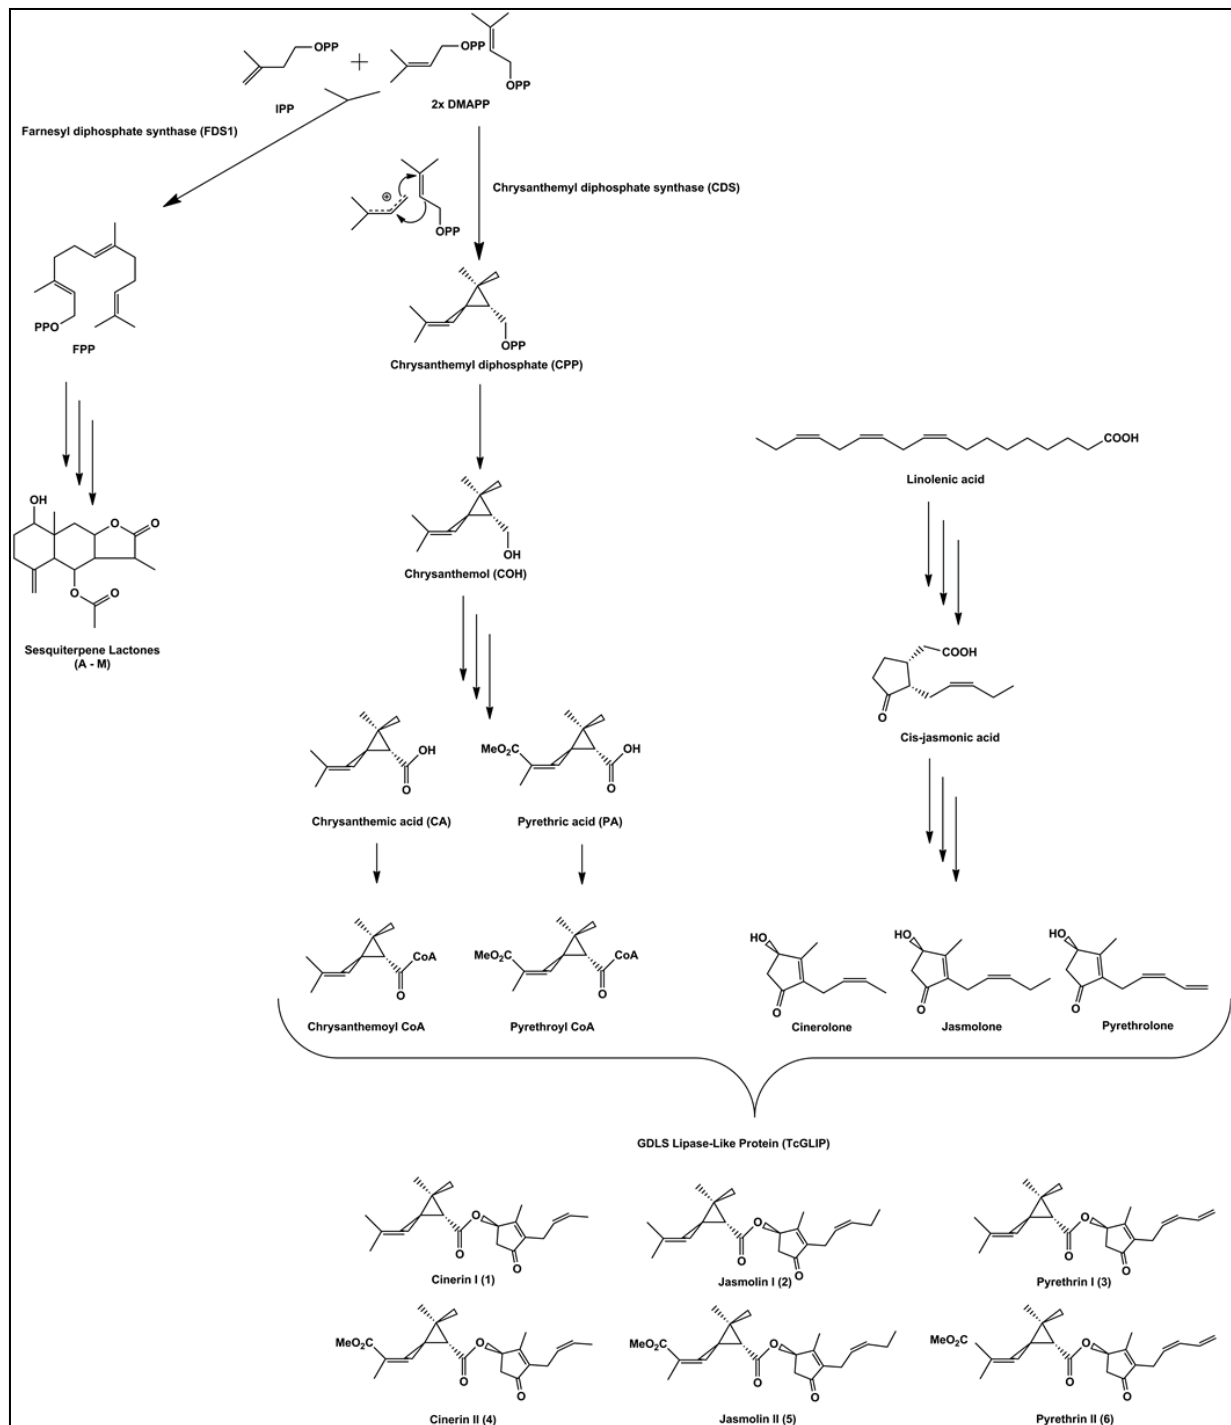

### Supplemental Figure 1: Biosynthesis of pyrethrins and sesquiterpene lactones.

The biosynthesis of sesquiterpenes generally initiates from the cytosolic precursor molecules IPP and DMAPP by means of a farnesyl diphosphate synthase (*FDS1*) to form FPP. Subsequently FPP is the substrate for many sesquiterpene synthases and modifying enzymes resulting in sesquiterpene lactones A-M (see also Table S1). Pyrethrin ester formation by the GDSL Lipase-like Protein (*GLIP*) is dependent on two dedicated precursor pathways. The irregular monoterpene branch of the plastidic precursor pathway initiates with the dedicated enzyme chrysanthemyl diphosphate synthase (*CDS*). *CDS* uses two DMAPP molecules to form CPP, which after dephosphorylation results in chrysanthemol (COH) and through oxidative steps in chrysanthemic acid (CA). The acid is CoA-activated and modified to form chrysanthemoyl or pyrethroyl CoA through a number of unknown steps. The oxylinin branch of the precursor pathway initiates from linolenic acid and finally leads to the lipid

alcohols jasmolone and/or pyrethrolone and/or cinerolone. GLIP then esterifies these two precursors into the six pyrethrin esters. It is not known whether interconversions between the esters occur after esterification or whether these conversions occur already at the alcohol stage or at both.

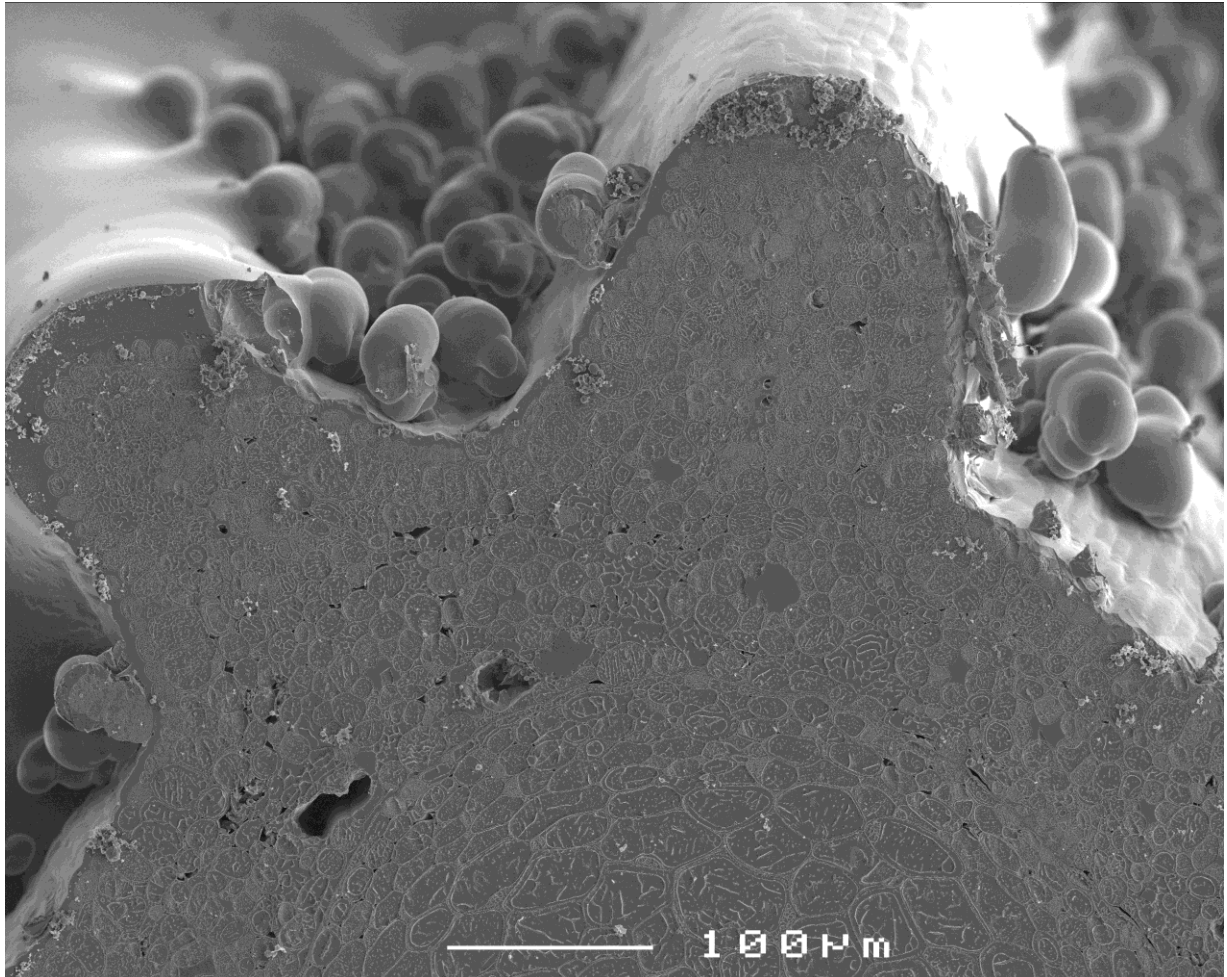

**Supplemental Figure 2:** CryoSEM image of a cross section of an achene that was used to draw Figure 6.

**Supplemental Table 1: List of compounds detected by GC-MS**

| Notation | Retention Time            | Mass spectrum Compound | Mass spectrum NIST | Name                                                                                                                         | Probability | KI   |
|----------|---------------------------|------------------------|--------------------|------------------------------------------------------------------------------------------------------------------------------|-------------|------|
| A        | Scan 2756<br>(16.602 min) |                        |                    | Naphtho[2,3-b]furan-2(3H)-one, 4-(acetyloxy)decahydro-8-hydroxy-3,8a-dimethyl-5-methylene-, [3R-(3Z,3a7,4f,4a7,8f,8a7,9a7)]  | 27.40%      | 2202 |
| 1        | Scan 2773<br>(16.665 min) |                        |                    | Cinenol                                                                                                                      | 59.30%      | 2212 |
| B        | Scan 2810<br>(16.819 min) |                        |                    | Dihydroxanthin                                                                                                               | 29.70%      | 2238 |
| C        | Scan 2842<br>(16.953 min) |                        |                    | 2H-Cyclohepta[b]furan-2-one, 6-[1-(acetyloxy)-5-oxobutyl]-3,3a,4,7,8,8a-hexahydro-7-methyl-3-methylene acetate, (3aR,7S,8aS) | 47.30%      | 2261 |
| 2        | Scan 2882<br>(17.120 min) |                        |                    | Jasmolinol                                                                                                                   | 67.90%      | 2290 |
| 3        | Scan 2890<br>(17.153 min) |                        |                    | Pyrethrin I                                                                                                                  | 95.70%      | 2296 |
| D        | Scan 2966<br>(17.554 min) |                        |                    | Xanthin, 1-acetoxy-3-methyl-3-demethylene-1,2-dihydro-                                                                       | 29.60%      | 2367 |
| E        | Scan 3052<br>(17.830 min) |                        |                    | Cyclohepta[b]furan-2(3H)-one, 5-(acetyloxy)-3a,4,5,8,9,11a-hexahydro-4-hydroxy-6,10-dimethyl-3-methylene-                    | 32.20%      | 2416 |
| F        | Scan 3103<br>(18.043 min) |                        |                    | Naphtho[2,3-b]furan-2(3H)-one, 4-(acetyloxy)decahydro-8-hydroxy-3,8a-dimethyl-5-methylene-, [3R-(3Z,3a7,4f,4a7,8f,8a7,9a7)]  | 77.50%      | 2454 |

|   |                           |  |                                                                                                                                                                          |                                                                                                                                                          |        |      |
|---|---------------------------|--|--------------------------------------------------------------------------------------------------------------------------------------------------------------------------|----------------------------------------------------------------------------------------------------------------------------------------------------------|--------|------|
| G | Scan 3130<br>(18.158 min) |  | <br>[Structure: Cycloclaca@furan-2(3H)-one, 9-(acetyloxy)-3a,4,5,8,9,11a-hexahydro-4-hydroxy-6,10-dimethyl-3-methylene-]                                                 | Cycloclaca@furan-2(3H)-one, 9-(acetyloxy)-3a,4,5,8,9,11a-hexahydro-4-hydroxy-6,10-dimethyl-3-methylene-                                                  | 55.10% | 2475 |
| H | Scan 3146<br>(18.222 min) |  | <br>[Structure: 2-Butenoic acid, 2-methyl-, dodecahydro-8-hydroxy-8a-methyl-3,5-bis(methylene)-2-oxocyclohexa[2,3-b]furan-4-yl ester, [3a], [3ac,4(2),4aa,6b,8a], [9a]]] | 2-Butenoic acid, 2-methyl-, dodecahydro-8-hydroxy-8a-methyl-3,5-bis(methylene)-2-oxocyclohexa[2,3-b]furan-4-yl ester, [3a], [3ac,4(2),4aa,6b,8a], [9a]]] | 54.30% | 2487 |
| I | Scan 3170<br>(18.323 min) |  | <br>[Structure: 2-Butenoic acid, 2-methyl-, dodecahydro-8-hydroxy-8a-methyl-3,5-bis(methylene)-2-oxocyclohexa[2,3-b]furan-4-yl ester, [3a], [3ac,4(2),4aa,6b,8a], [9a]]] | 2-Butenoic acid, 2-methyl-, dodecahydro-8-hydroxy-8a-methyl-3,5-bis(methylene)-2-oxocyclohexa[2,3-b]furan-4-yl ester, [3a], [3ac,4(2),4aa,6b,8a], [9a]]] | 67.00% | 2506 |
| J | Scan 3194<br>(18.423 min) |  | <br>[Structure: Naphtho[2,3-b]furan-2(3H)-one, 4-(acetyloxy)decahydro-6-hydroxy-3,8a-dimethyl-5-methylene-, [3c], [3a], [3ac,4(2),4aa,6b,8a], [9a]]]                     | Naphtho[2,3-b]furan-2(3H)-one, 4-(acetyloxy)decahydro-6-hydroxy-3,8a-dimethyl-5-methylene-, [3c], [3a], [3ac,4(2),4aa,6b,8a], [9a]]]                     | 53.00% | 2525 |
| 4 | Scan 3226<br>(18.556 min) |  | <br>[Structure: Cinearin II]                                                                                                                                             | Cinearin II                                                                                                                                              | 93.40% | 2550 |
| K | Scan 3242<br>(18.623 min) |  | <br>[Structure: Cycloclaca@furan-2(3H)-one, 9-(acetyloxy)-3a,4,5,8,11a-hexahydro-4-hydroxy-6,10-dimethyl-3-methylene-]                                                   | Cycloclaca@furan-2(3H)-one, 9-(acetyloxy)-3a,4,5,8,11a-hexahydro-4-hydroxy-6,10-dimethyl-3-methylene-                                                    | 37.20% | 2563 |
| 5 | Scan 3322<br>(18.957 min) |  | <br>[Structure: Jasmolin II]                                                                                                                                             | Jasmolin II                                                                                                                                              | 62.60% | 2627 |
| 6 | Scan 3327<br>(18.978 min) |  | <br>[Structure: Jasmolin II]                                                                                                                                             | Jasmolin II                                                                                                                                              | 95.30% | 2631 |
| L | Scan 3376<br>(19.163 min) |  | <br>[Structure: 2-Butenoic acid, 2-methyl-, dodecahydro-8-hydroxy-8a-methyl-3,5-bis(methylene)-2-oxocyclohexa[2,3-b]furan-4-yl ester, [3a], [3ac,4(2),4aa,6b,8a], [9a]]] | 2-Butenoic acid, 2-methyl-, dodecahydro-8-hydroxy-8a-methyl-3,5-bis(methylene)-2-oxocyclohexa[2,3-b]furan-4-yl ester, [3a], [3ac,4(2),4aa,6b,8a], [9a]]] | 63.70% | 2671 |
| M | Scan 3390<br>(19.241 min) |  | <br>[Structure: 2-Methylbut-2-enoic acid [5,8-dihydroxy-5,8a-dimethyl-3-methylene-2-oxododecalo[3,4-b]furan-4-yl]ester]                                                  | 2-Methylbut-2-enoic acid [5,8-dihydroxy-5,8a-dimethyl-3-methylene-2-oxododecalo[3,4-b]furan-4-yl]ester]                                                  | 69.20% | 2683 |

**Supplemental Table 2:** Non-normalized and normalized RT-qPCR results for 4 biosynthetic genes and the GAPDH gene (used for normalization). In yellow the presented data

|                                                                                             | Ovaries with trichomes | Ovaries without trichomes | Trichomes | Leaves | Seedlings |  | Ovaries with trichomes                                | Ovaries without trichomes | Trichomes | Leaves | Seedlings |      |
|---------------------------------------------------------------------------------------------|------------------------|---------------------------|-----------|--------|-----------|--|-------------------------------------------------------|---------------------------|-----------|--------|-----------|------|
| <b>Ct values (uncorrected with GAPDH)</b>                                                   |                        |                           |           |        |           |  | <b>Ct SD values (SD, uncorrected with GAPDH)</b>      |                           |           |        |           |      |
| <b>GAPDH</b>                                                                                | 17.14                  | 16.62                     | 17.59     | 17.00  | 18.26     |  | <b>GAPDH</b>                                          | 0.31                      | 0.35      | 0.29   | 0.45      | 0.37 |
| <b>CDS</b>                                                                                  | 19.20                  | 20.74                     | 15.57     | 20.99  | 31.00     |  | <b>CDS</b>                                            | 0.21                      | 0.20      | 0.50   | 0.50      | 1.01 |
| <b>GLIP</b>                                                                                 | 19.76                  | 17.76                     | 24.02     | 18.88  | 21.25     |  | <b>GLIP</b>                                           | 0.22                      | 0.09      | 0.35   | 0.45      | 0.54 |
| <b>FDS</b>                                                                                  | 18.75                  | 19.45                     | 16.75     | 19.39  | 20.4      |  | <b>FDS</b>                                            | 0.04                      | 0.11      | 0.16   | 0.28      | 0.33 |
| <b>Percentage values relative to the highest expressed gene ( not corrected with GAPDH)</b> |                        |                           |           |        |           |  | <b>Percentage error (STE, uncorrected with GAPDH)</b> |                           |           |        |           |      |
| <b>GAPDH</b>                                                                                | 33.7                   | 48.3                      | 24.7      | 37.1   | 15.5      |  | <b>GAPDH</b>                                          | 4.7                       | 7.7       | 3.2    | 7.8       | 2.6  |
| <b>CDS</b>                                                                                  | 8.1                    | 2.8                       | 100.0     | 2.3    | 0.0       |  | <b>CDS</b>                                            | 0.7                       | 0.2       | 23.9   | 0.6       | 0.0  |
| <b>GLIP</b>                                                                                 | 5.5                    | 21.9                      | 0.3       | 10.1   | 2.0       |  | <b>GLIP</b>                                           | 0.5                       | 0.8       | 0.0    | 2.1       | 0.5  |
| <b>FDS</b>                                                                                  | 11.0                   | 6.8                       | 44.1      | 7.1    | 3.5       |  | <b>FDS</b>                                            | 0.2                       | 0.3       | 3.0    | 0.9       | 0.5  |
| <b>Percentage values relative per gene (not corrected with GAPDH)</b>                       |                        |                           |           |        |           |  | <b>Percentage error (STE, uncorrected with GAPDH)</b> |                           |           |        |           |      |
| <b>GAPDH</b>                                                                                | 69.7                   | 100.0                     | 51.1      | 76.8   | 32.1      |  | <b>GAPDH</b>                                          | 9.7                       | 15.9      | 6.6    | 16.2      | 5.4  |
| <b>CDS</b>                                                                                  | 8.1                    | 2.8                       | 100.0     | 2.3    | 0.0       |  | <b>CDS</b>                                            | 0.7                       | 0.2       | 23.9   | 0.6       | 0.0  |
| <b>GLIP</b>                                                                                 | 25.0                   | 100.0                     | 1.3       | 46.0   | 8.9       |  | <b>GLIP</b>                                           | 2.4                       | 3.7       | 0.2    | 9.7       | 2.3  |
| <b>FDS</b>                                                                                  | 25.0                   | 15.4                      | 100.0     | 16.0   | 8.0       |  | <b>FDS</b>                                            | 0.4                       | 0.7       | 6.8    | 2.0       | 1.2  |
| <b>Percentage values relative to the highest expressed gene (corrected with GAPDH)</b>      |                        |                           |           |        |           |  | <b>Percentage error (STE, corrected with GAPDH)</b>   |                           |           |        |           |      |
| <b>GAPDH</b>                                                                                | 24.7                   | 24.7                      | 24.7      | 24.7   | 24.7      |  | <b>GAPDH</b>                                          | 3.4                       | 3.9       | 3.2    | 5.2       | 4.2  |
| <b>CDS</b>                                                                                  | 5.9                    | 1.4                       | 100.0     | 1.6    | 0.0       |  | <b>CDS</b>                                            | 0.5                       | 0.1       | 23.9   | 0.4       | 0.0  |
| <b>GLIP</b>                                                                                 | 4.0                    | 11.2                      | 0.3       | 6.7    | 3.1       |  | <b>GLIP</b>                                           | 0.4                       | 0.4       | 0.0    | 1.4       | 0.8  |
| <b>FDS</b>                                                                                  | 8.1                    | 3.5                       | 44.1      | 4.7    | 5.6       |  | <b>FDS</b>                                            | 0.1                       | 0.2       | 3.0    | 0.6       | 0.8  |
| <b>Percentage values relative per gene (corrected with GAPDH)</b>                           |                        |                           |           |        |           |  | <b>Percentage error (STE, corrected with GAPDH)</b>   |                           |           |        |           |      |
| <b>GAPDH</b>                                                                                | 100.0                  | 100.0                     | 100.0     | 100.0  | 100.0     |  | <b>GAPDH</b>                                          | 13.8                      | 15.9      | 12.9   | 21.1      | 16.9 |
| <b>CDS</b>                                                                                  | 5.9                    | 1.4                       | 100.0     | 1.6    | 0.0       |  | <b>CDS</b>                                            | 0.5                       | 0.1       | 23.9   | 0.4       | 0.0  |
| <b>GLIP</b>                                                                                 | 59.9                   | 167.0                     | 4.3       | 100.0  | 46.3      |  | <b>GLIP</b>                                           | 5.7                       | 6.2       | 0.7    | 21.1      | 12.1 |
| <b>FDS1</b>                                                                                 | 18.3                   | 7.9                       | 100.0     | 10.7   | 12.7      |  | <b>FDS</b>                                            | 0.3                       | 0.4       | 6.8    | 1.3       | 1.9  |

**Supplemental Table 3:** Content of pyrethrin biosynthesis related compounds in ovaries and trichomes in terms of specific masses and relative to ovaries with less trichomes before and after normalization with the content of STL (measure for trichome quantities). In yellow the presented data

|                                                             | mass       | specific mass peaks           |            |           | standard error of specific mass peaks |         |           |
|-------------------------------------------------------------|------------|-------------------------------|------------|-----------|---------------------------------------|---------|-----------|
|                                                             |            | O+                            | O-         | T         | O+                                    | O-      | T         |
| <b>Chrysanthemol (COH)</b>                                  | <b>123</b> | 13,707                        | 4,398      | 41,200    | 6,405                                 | 1,126   | 14,916    |
| <b>Chrysanthemic acid (CA)</b>                              | <b>123</b> | 146,786                       | 107,356    | 139,779   | 36,959                                | 4,396   | 30,307    |
| <b>Cinerin I (C1)</b>                                       | <b>123</b> | 19,529,560                    | 22,255,871 | 662,826   | 3,114,186                             | 513,384 | 40,493    |
| <b>Jasmolin I (J1)</b>                                      | <b>123</b> | 9,098,617                     | 7,838,073  | 210,668   | 1,518,776                             | 237,640 | 14,255    |
| <b>Pyrethrin I (P1)</b>                                     | <b>123</b> | 4,662,062                     | 4,548,377  | 133,909   | 159,101                               | 269,554 | 14,750    |
| <b>Cinerin II (C2)</b>                                      | <b>133</b> | 1,692,842                     | 2,108,493  | 52,890    | 252,861                               | 20,433  | 2,895     |
| <b>Pyrethrin II Jasmolin II (P/J2)</b>                      | <b>133</b> | 3,103,531                     | 3,505,555  | 114,003   | 136,800                               | 112,014 | 22,493    |
| <b>Dihydro-<math>\beta</math>-cyclo-pyrethosin (peak E)</b> | <b>84</b>  | 5,240,300                     | 1,826,885  | 9,613,170 | 705,367                               | 95,580  | 1,957,667 |
|                                                             |            | relative % mass peaks         |            |           | STE relative % mass peaks             |         |           |
|                                                             |            | O+                            | O-         | T         | O+                                    | O-      | T         |
| <b>Chrysanthemol (COH)</b>                                  | <b>123</b> | 312                           | 100        | 936.72    | 146                                   | 26      | 339.13    |
| <b>Chrysanthemic acid (CA)</b>                              | <b>123</b> | 137                           | 100        | 130.20    | 34                                    | 4       | 28.23     |
| <b>Cinerin I (C1)</b>                                       | <b>123</b> | 88                            | 100        | 2.98      | 14                                    | 2       | 0.18      |
| <b>Jasmolin I (J1)</b>                                      | <b>123</b> | 116                           | 100        | 2.69      | 19                                    | 3       | 0.18      |
| <b>Pyrethrin I (P1)</b>                                     | <b>123</b> | 102                           | 100        | 2.94      | 3                                     | 6       | 0.32      |
| <b>Cinerin II (C2)</b>                                      | <b>133</b> | 80                            | 100        | 2.51      | 12                                    | 1       | 0.14      |
| <b>Pyrethrin II Jasmolin II (P/J2)</b>                      | <b>133</b> | 89                            | 100        | 3.25      | 4                                     | 3       | 0.64      |
| <b>Dihydro-<math>\beta</math>-cyclo-pyrethosin (peak E)</b> | <b>84</b>  | 287                           | 100        | 526.21    | 39                                    | 5       | 107.16    |
|                                                             |            | relative % normalized for STL |            |           | STE relative % normalized for STL     |         |           |
|                                                             |            | O+                            | O-         | T         | O+                                    | O-      | T         |
| <b>Chrysanthemol (COH)</b>                                  | <b>123</b> | 109                           | 100        | 178.01    | 51                                    | 26      | 64.45     |
| <b>Chrysanthemic acid (CA)</b>                              | <b>123</b> | 48                            | 100        | 24.74     | 12                                    | 4       | 5.36      |
| <b>Cinerin I (C1)</b>                                       | <b>123</b> | 31                            | 100        | 0.57      | 5                                     | 2       | 0.03      |
| <b>Jasmolin I (J1)</b>                                      | <b>123</b> | 40                            | 100        | 0.51      | 7                                     | 3       | 0.03      |
| <b>Pyrethrin I (P1)</b>                                     | <b>123</b> | 36                            | 100        | 0.56      | 1                                     | 6       | 0.06      |
| <b>Cinerin II (C2)</b>                                      | <b>133</b> | 28                            | 100        | 0.48      | 4                                     | 1       | 0.03      |
| <b>Pyrethrin II Jasmolin II (P/J2)</b>                      | <b>133</b> | 31                            | 100        | 0.62      | 1                                     | 3       | 0.12      |
| <b>Dihydro-<math>\beta</math>-cyclo-pyrethosin (peak E)</b> | <b>84</b>  | 100                           | 100        | 100.00    | 13                                    | 5       | 20.36     |

**Supplemental Table 4.** Peak areas based on specific masses (blue panels) of chrysanthemic acid, STL peak E and the different pyrethrin esters in husk extracts, seedling washes and seedling extracts relative to intact seeds (set at 100%). Yellow panels are presented data

|         | Average specific mass                  |         |        |          |  | STE average specific mass                         |        |       |          |
|---------|----------------------------------------|---------|--------|----------|--|---------------------------------------------------|--------|-------|----------|
|         | Seed                                   | Husk    | Wash   | Seedling |  | Seed                                              | Husk   | Wash  | Seedling |
| CA      | 6874350                                | 1682126 | 35985  | 284801   |  | 667373                                            | 138626 | 6552  | 16777    |
| Peak E  | 884562                                 | 79720   |        |          |  | 31874                                             | 22519  |       |          |
| CI      | 6115784                                | 558022  | 249916 | 7757030  |  | 894003                                            | 92851  | 27612 | 183378   |
| CII     | 390053                                 | 63153   | 37203  | 535508   |  | 54339                                             | 8561   | 8917  | 24568    |
| JI/PI   | 11241149                               | 2244962 | 617091 | 10192002 |  | 1218054                                           | 208433 | 49623 | 1305371  |
| JII/PII | 2103551                                | 142430  | 214486 | 3586957  |  | 196549                                            | 30822  | 29716 | 13279    |
|         |                                        |         |        |          |  |                                                   |        |       |          |
|         | Relative content compared to seeds (%) |         |        |          |  | STE of the relative content compared to seeds (%) |        |       |          |
|         | Seed                                   | Husk    | Wash   | Seedling |  | Seed                                              | Husk   | Wash  | Seedling |
| CA      | 100.0                                  | 24.5    | 0.5    | 4.1      |  | 9.7                                               | 2.0    | 0.1   | 0.2      |
| Peak E  | 100.0                                  | 9.0     | 0.0    | 0.0      |  | 3.6                                               | 2.5    | 0.0   | 0.0      |
| CI      | 100.0                                  | 9.1     | 4.1    | 126.8    |  | 14.6                                              | 1.5    | 0.5   | 3.0      |
| CII     | 100.0                                  | 16.2    | 9.5    | 137.3    |  | 13.9                                              | 2.2    | 2.3   | 6.3      |
| JI/PI   | 100.0                                  | 20.0    | 5.5    | 90.7     |  | 10.8                                              | 1.9    | 0.4   | 11.6     |
| JII/PII | 100.0                                  | 6.8     | 10.2   | 170.5    |  | 9.3                                               | 1.5    | 1.4   | 0.6      |
